# Supplementary material for: Grafting of Polypyrrole-3-carboxylic Acid to the Surface of Hexamethylene Diisocyanate-Functionalized Graphene Oxide
Source: PubMed Central journal article supplement (PMC6723346; doi:10.3390/nano9081095), 2019-07-31
Supplement: nanomaterials-09-01095-s001.pdf [file nanomaterials-09-01095-s001.pdf]

## Supplementary Materials

# Grafting of polypyrrole-3-carboxylic acid to the surface of hexamethylene diisocyanate-functionalized graphene oxide

José Antonio Luceño-Sánchez<sup>1</sup> and Ana Maria Díez-Pascual<sup>1,\*</sup>

<sup>1</sup> Department of Analytical Chemistry, Physical Chemistry and Chemical Engineering, Faculty of Sciences, Alcalá University, 28805 Madrid, Spain; jose.luceno@uah.es

\* Correspondence: am.diez@uah.es; Tel.: +34-918-856-430

**Table S1.** TGA, surface area and sheet resistance data of GO, HDI-GO, PPy-COOH and the grafted samples.

| Sample              | T <sub>i</sub><br>(°C) | T <sub>10</sub><br>(°C) | T <sub>max(I,II)</sub><br>(°C) | R<br>(wt%) | SSA<br>(m <sup>2</sup> /g) | Rs<br>(Ω/sq) |
|---------------------|------------------------|-------------------------|--------------------------------|------------|----------------------------|--------------|
| GO                  | 121                    | 186                     | 222, -                         | 48.5       | 103.1                      | -            |
| HDI-GO              | 190                    | 298                     | 225, 387                       | 48.2       | 81.2                       | -            |
| PPy-COOH            | 202                    | 257                     | 276, 444                       | 8.6        | 25.4                       | 181          |
| PPy-COOH-g-HDI-GO-1 | 204                    | 255                     | 271, 472                       | 13.1       | 58.3                       | 330          |
| PPy-COOH-g-HDI-GO-2 | 195                    | 271                     | 290, 486                       | 13.5       | 49.0                       | 253          |

T<sub>i</sub>: initial degradation temperature at 2% weight loss; T<sub>10</sub>: temperature of 10% of weight loss. T<sub>max</sub>: temperature of maximum rate of weight loss. The subscripts I and II refer to the first and second degradation stages, respectively. R: residue at 600 °C. Rs: sheet resistance; SSA: specific surface area
